# Supplementary material for: Solid phase silver sulfide nanoparticles contribute significantly to biotic silver in agricultural systems
Source: Royal Society of Chemistry journal article supplement (doi:10.1039/d4en00961d), 2024-11-25
Supplement: d4en00961d1.pdf [file d4en00961d1.pdf]

**Supporting Information for**

**Solid Phase Silver Sulfide Nanoparticles Contribute Significantly to  
Biotic Silver in Agricultural Systems**

Yingnan Huang<sup>a#</sup>, Huijun Yan<sup>a,b#</sup>, Fei Dang<sup>a\*</sup>, Zhenyu Wang<sup>c,d</sup>, Jason C. White<sup>e</sup>,  
Yujun Wang<sup>a</sup>

<sup>a</sup> State Key Laboratory of Soil and Sustainable Agriculture, Institute of Soil Science,  
Chinese Academy of Sciences, Nanjing 211135, China

<sup>b</sup> College of Geography and Environment, Shandong Normal University, Jinan  
250358, China

<sup>c</sup> Institute of Environmental Processes and Pollution Control, and School of  
Environment and Civil Engineering, Jiangnan University, Wuxi 214122, China

<sup>d</sup> Jiangsu Engineering Laboratory for Biomass Energy and Carbon Reduction  
Technology, Jiangnan University, Wuxi 214122, China

<sup>e</sup> Connecticut Agricultural Experiment Station, New Haven, CT 06504, USA

<sup>#</sup> Y.N.H. and H.J.Y. contributed equally to this work.

\*Corresponding author: Fei Dang

Email: fdang@issas.ac.cn

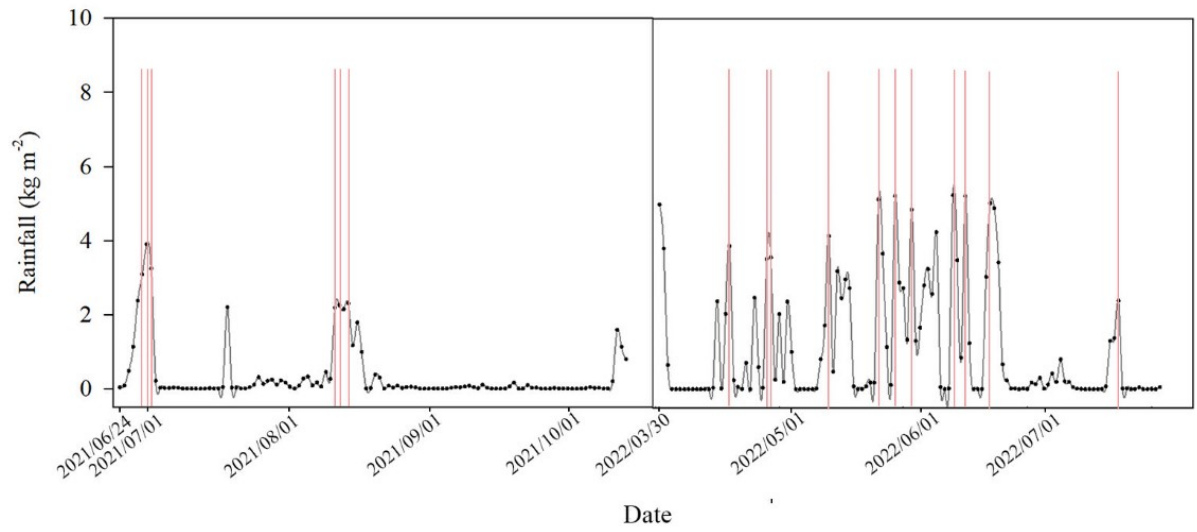

Figure S1. Rainfall data are based on historical re-analysis datasets from the European Centre for Medium-Range Weather Forecasts (ECMWF)/National Aeronautics and Space Administration (NASA), provided by [www.xihe-energy.com](http://www.xihe-energy.com). The vertical pink line indicates the time when the mesocosms were covered by a temporary roof.

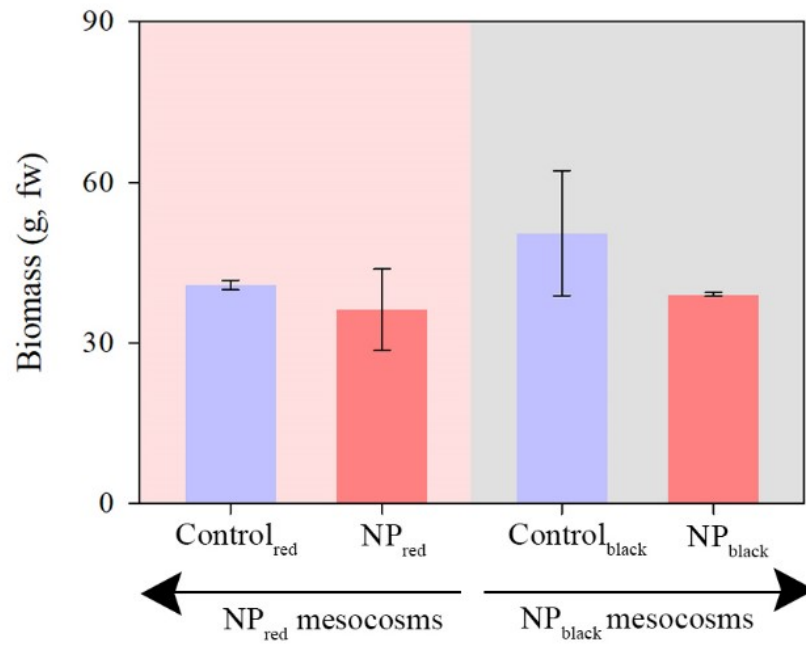

Figure S2. The fresh weight of radish roots from NP<sub>red</sub> and NP<sub>black</sub> mesocosms. NP<sub>red</sub>: mesocosms with NPs in red soil; NP<sub>black</sub>: mesocosms with NPs in black soil. Data shown are the averages of two replicates  $\pm$  SD. All individuals were pooled together for each replicate. No significant difference was observed between the treatments at  $p > 0.05$ .

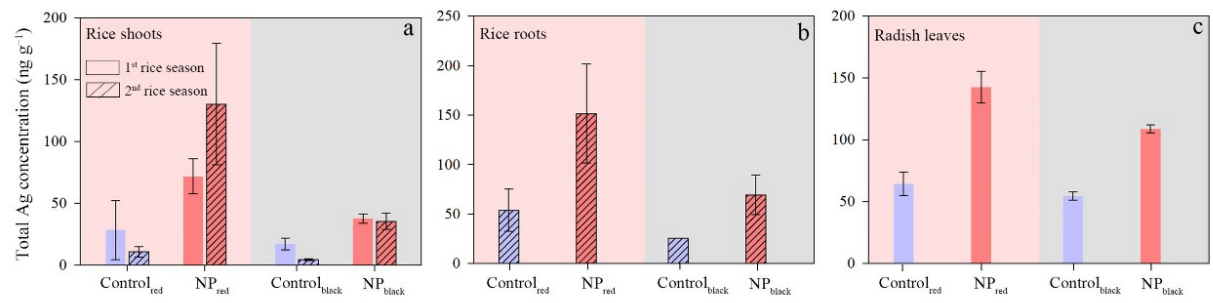

Figure S3. Bioaccumulation of Ag in (a) rice shoots, (b) rice roots, and (c) radish leaves after exposure to NPs. NP<sub>red</sub>: mesocosms with NPs in red soil; NP<sub>black</sub>: mesocosms with NPs in black soil. Data shown are the averages of four replicates  $\pm$  SD for rice shoots and radish leaves, and the averages of two replicates  $\pm$  SD for rice roots.

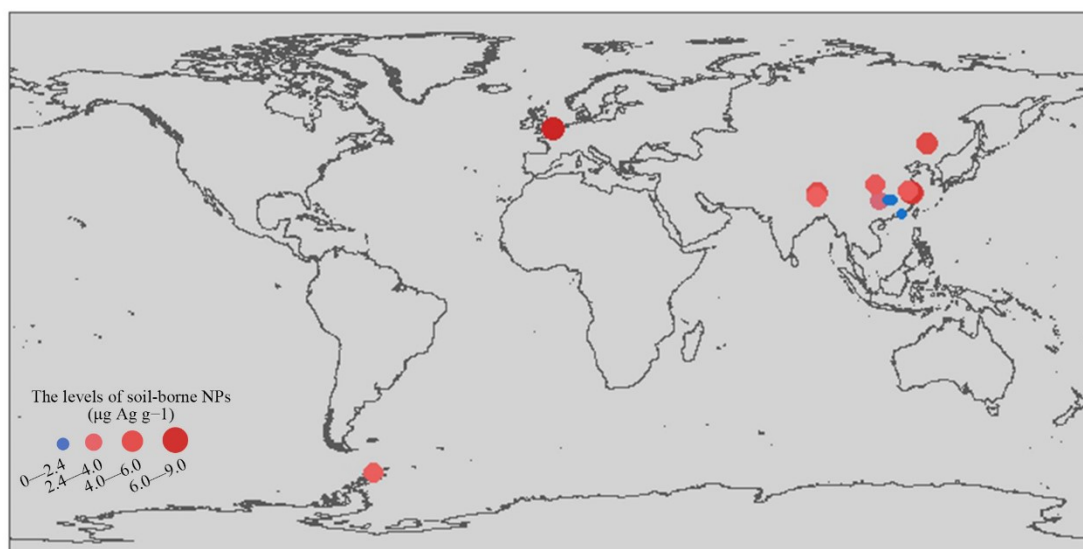

Figure S4. The available data on the levels of soil-borne NPs. The data are available in the literature.<sup>1-3</sup>

Table S1. Physical and chemical properties of the sampled soils.

| Sample     | Texture       | Organic matter<br>content<br>(g kg <sup>-1</sup> ) <sup>a *</sup> | pH <sup>b *</sup> | CEC <sup>c</sup><br>(mol kg <sup>-1</sup> ) | Total nitrogen <sup>d</sup><br>(%) | Total Ag<br>(mg kg <sup>-1</sup> )* | Total Fe<br>(g kg <sup>-1</sup> )* |
|------------|---------------|-------------------------------------------------------------------|-------------------|---------------------------------------------|------------------------------------|-------------------------------------|------------------------------------|
| Red soil   | Loamy<br>clay | 16.9 ± 0.03                                                       | 5.0 ± 0.04        | 12.3                                        | 0.16                               | 0.4 ± 0.01                          | 37.1 ± 1.7                         |
| Black soil | Loamy<br>clay | 27.6 ± 0.1                                                        | 6.7 ± 0.1         | 29.0                                        | 0.15                               | 0.2 ± 0.01                          | 28.6 ± 0.9                         |

<sup>a</sup> Determination of organic matter by potassium dichromate oxidation and external heating. Data shown are the averages of two replicates ± SD (n=2).

<sup>b</sup> pH was determined by potentiometric method with soil-water ratio 1:5. Data shown are the averages of two replicates ± SD (n=2).

<sup>c</sup> Determination of cation exchange capacity (CEC) by EDTA-ammonium salt.

<sup>d</sup> Determination of total nitrogen by semi-trace Kjeldahl method.

\*A significant difference was observed between the soils ( $p < 0.05$ ).

Table S2. Concentrations of major cations in the water column before NPs addition. The water was collected from a local Reservoir. The cations were measured by Inductively Coupled Plasma Optical Emission Spectrometry (iCAP7400, Thermo Fisher, USA). Data shown are the averages of four replicates  $\pm$  SD.

| Cations (mg L <sup>-1</sup> ) | NP <sub>Red</sub> mesocosm | NP <sub>Black</sub> mesocosm |
|-------------------------------|----------------------------|------------------------------|
| K <sup>+</sup> *              | 2.5 $\pm$ 0.7              | 0.8 $\pm$ 0.4                |
| Ca <sup>2+</sup> *            | 8.3 $\pm$ 0.7              | 76.1 $\pm$ 8.2               |
| Mg <sup>2+</sup> *            | 5.2 $\pm$ 1.0              | 13.8 $\pm$ 1.0               |

\* A significant difference was observed between the soils ( $p < 0.05$ ).

Table S3. The isotope abundances of  $^{109}\text{Ag}_2\text{S-NPs}$  and  $\text{Ag}_2\text{S-NPs}$ .

| Isotope           | Abundance                            |                                            |
|-------------------|--------------------------------------|--------------------------------------------|
|                   | $\text{Ag}_2\text{S-NPs}^{\text{a}}$ | $^{109}\text{Ag}_2\text{S-NPs}^{\text{b}}$ |
| $^{107}\text{Ag}$ | 0.5180                               | 0.0042                                     |
| $^{109}\text{Ag}$ | 0.4820                               | 0.9958                                     |

<sup>a</sup> The abundance of  $^{107}\text{Ag}$  and  $^{109}\text{Ag}$  in  $\text{Ag}_2\text{S-NPs}$  are the natural abundances of Ag, respectively.<sup>4</sup>

<sup>b</sup> The abundances of  $^{107}\text{Ag}$  and  $^{109}\text{Ag}$  in  $^{109}\text{Ag}_2\text{S-NPs}$  are calculated based on the determined concentrations of  $^{107}\text{Ag}$  and  $^{109}\text{Ag}$  by ICP-MS. Data shown are the averages of ten replicates.

Table S4. The relative bioavailability of water-borne to soil-borne NPs. This is calculated as the percentage of biotic Ag from initially water-borne NPs (i.e., normalized by their exposure concentrations) divided by the percentage of biotic Ag from the soil-borne NPs.

| Soil type                     | Plant        | Time                        | Relative bioavailability<br>of water-borne NPs to<br>soil-borne NPs |
|-------------------------------|--------------|-----------------------------|---------------------------------------------------------------------|
| NP <sub>red</sub> mesocosms   | Brown rice   | 1 <sup>st</sup> rice season | 2.4 ± 1.5 <sup>a</sup>                                              |
|                               |              | 2 <sup>nd</sup> rice season | 0.2 ± 0.1 <sup>a</sup>                                              |
|                               | Duckweed     | 2 <sup>nd</sup> rice season | 8.1 ± 0.01 <sup>b</sup>                                             |
|                               | Rice borer   | 2 <sup>nd</sup> rice season | 1.3 ± 1.8 <sup>b</sup>                                              |
| NP <sub>black</sub> mesocosms | Brown rice   | 1 <sup>st</sup> rice season | 3.1 ± 0.6 <sup>a</sup>                                              |
|                               |              | 2 <sup>nd</sup> rice season | 1.8 ± 0.6 <sup>a</sup>                                              |
|                               | Duckweed     | 2 <sup>nd</sup> rice season | 6.8 ± 2.8 <sup>b</sup>                                              |
|                               | Rice borer   | 2 <sup>nd</sup> rice season | 2.8 ± 1.0 <sup>b</sup>                                              |
| NP <sub>red</sub> mesocosms   | Radish roots | -                           | 2.6 ± 0.5 <sup>a</sup>                                              |
| NP <sub>black</sub> mesocosms | Radish roots | -                           | 4.8 ± 0.7 <sup>a</sup>                                              |

<sup>a</sup> Data shown are the averages of four replicates ± SD.

<sup>b</sup> Data shown are the averages of two replicates ± SD.

Table S5. The soil-to-plant transfer factor for soil-borne NPs (TF, the ratio of Ag concentrations in edible tissues derived from soil-borne NPs to their soil-borne NPs levels).

| Soil type                     | Plant        | Time                        | TF value             |
|-------------------------------|--------------|-----------------------------|----------------------|
| NP <sub>red</sub> mesocosms   | Brown rice   | 1 <sup>st</sup> rice season | $2.1 \times 10^{-2}$ |
|                               |              | 2 <sup>nd</sup> rice season | $1.4 \times 10^{-2}$ |
| NP <sub>black</sub> mesocosms | Brown rice   | 1 <sup>st</sup> rice season | $1.8 \times 10^{-2}$ |
|                               |              | 2 <sup>nd</sup> rice season | $4.6 \times 10^{-3}$ |
| NP <sub>red</sub> mesocosms   | Radish roots | -                           | $7.4 \times 10^{-2}$ |
| NP <sub>black</sub> mesocosms | Radish roots | -                           | $1.5 \times 10^{-2}$ |

## REFERENCES

1. A. Hong, Q. Tang, A. U. Khan, M. Miao, Z. Xu, and F. Dang, *et al.*, Identification and speciation of nanoscale silver in complex solid matrices by sequential extraction coupled with inductively coupled plasma optical emission spectrometry. *Anal. Chem.*, 2021, **93**, 1962-1968.
2. L. Li, Q. Wang, Y. Yang, L. Luo, R. Ding, and Z.G. Yang *et al.*, Extraction method development for quantitative detection of silver nanoparticles in environmental soils and sediments by single particle inductively coupled plasma mass spectrometry. *Anal. Chem.*, 2019, **91**, 9442-9450.
3. P. Wang, N. W. Menzies, P. G. Dennis, J. Guo, C. Forstner, and R. Sekine, *et al.*, Silver nanoparticles entering soils via the wastewater–sludge–soil pathway pose low risk to plants but elevated Cl concentrations increase Ag bioavailability. *Environ. Sci. Technol.*, 2016, **50**, 8274-8281.
4. F. Dang, Y. Z. Chen, Y. N. Huang, H. Hintelmann, Y. B. Si and D. M. Zhou, Discerning the sources of silver nanoparticle in a terrestrial food chain by stable isotope tracer technique. *Environ. Sci. Technol.*, 2019, **53**, 3802-3810.
